# Supplementary material
Source: PubMed Central journal article supplement (PMC3056880)
Supplement: NIHMS277160-supplement-01.pdf [file NIHMS277160-supplement-01.pdf]

## Supplement to Notifiable genetic variants on commercially-available SNP arrays

**Supplemental Table 1. Full information on genetic variants identified in this study from the GeneTest database.** Included are information on disease, affected gene, variants tested in CLIA-labs, variants for which unique SNP identifiers could and could not be located, and presence of variants and proxies in HapMap and on commercial genotyping arrays.

| Disease                                               | Gene            | Chr             | Variants listed on Gene Tests | Variants for which SNPids could not be determined | Variants with SNPids                                                                                                                                                                | Total with SNPids | SNPs in HapMap: (Variant) rsID         | SNP arrays on which variant is present: (rsID) array(s) | Proxy SNPs in HapMap: (SNP) Proxy SNP | SNP arrays on which Proxy SNP is present: (Proxy SNP) Array(s) |
|-------------------------------------------------------|-----------------|-----------------|-------------------------------|---------------------------------------------------|-------------------------------------------------------------------------------------------------------------------------------------------------------------------------------------|-------------------|----------------------------------------|---------------------------------------------------------|---------------------------------------|----------------------------------------------------------------|
| 21-Hydroxylase Deficiency                             | <i>CYP21A2</i>  | 6p21.3          | 13                            | 4 - P30L, P31L, I173N, I236N                      | 9 - (V237E) rs12530380, (M239K) rs6476, (V281L) rs6471, (Q318X) rs7755898, (R356W) rs7769409, (I172N) rs6475, (P453S) rs6445, (R357T) rs7769409, (656A/C>G) rs6467                  | 9                 | (V237E) rs12530380; (M239K) rs6476     | (rs12530380) AG                                         |                                       |                                                                |
| Achondroplasia                                        | <i>FGFR3</i>    | 4p16.3          | 2                             | 1 - G375C                                         | 1 - (G380R) rs28931614                                                                                                                                                              | 1                 |                                        |                                                         |                                       |                                                                |
| Alpha-1-Antitrypsin Deficiency                        | <i>SERPINA1</i> | 14q32.1         | 2                             | 0                                                 | 2 - (Q342K) rs17850837, (Q264V) rs17580                                                                                                                                             | 2                 |                                        |                                                         |                                       |                                                                |
| Alpha-Thalassemia                                     | <i>HBA1</i>     | 16p13.33-p13.11 | 0                             | 0                                                 | 0                                                                                                                                                                                   | 0                 |                                        |                                                         |                                       |                                                                |
| Beta-Thalassemia                                      | <i>HBB</i>      | 11p15.5         | 10                            | 3 - IVS1-5, Codon 15, HbE                         | 7 - (IVS1-1) rs33943001, (delAA>K8stop) rs35497102, (insG,K8S9>stop) rs35699606, (FS41/42delTTCT) rs34532766, (-29A>Gtatabox) rs34598529, (-88C>T) rs33944208, (IVS2nt1) rs33945777 | 7                 |                                        |                                                         |                                       |                                                                |
| Biotinidase Deficiency                                | <i>BTBD</i>     | 3p25            | 8                             | 5 - G98d7i3, R157H, F403V, Q456H, R538C           | 3 - (D444H) rs13078881, (A171T) rs13073139, (D252G) rs28934601                                                                                                                      | 3                 | (D444H) rs13078881; (A171T) rs13073139 | (rs13078881) AG                                         |                                       |                                                                |
| Bloom Syndrome                                        | <i>BLM</i>      | 15q26.1         | 2                             | 2 - 2281del6/ins7 (blmASH), insT2407              | 0                                                                                                                                                                                   | 0                 |                                        |                                                         |                                       |                                                                |
| BRCA1 Hereditary Breast/Ovarian Cancer                | <i>BRCA1</i>    | 17q21           | 4                             | 4 - Tyr978X, 185delAG, 5382insC, 6174delT         | 0                                                                                                                                                                                   | 0                 |                                        |                                                         |                                       |                                                                |
| BRCA2 Hereditary Breast/Ovarian Cancer                | <i>BRCA2</i>    | 13q12.3         | 1                             | 1 - 6174delT                                      | 0                                                                                                                                                                                   | 0                 |                                        |                                                         |                                       |                                                                |
| Canavan Disease                                       | <i>ASPA</i>     | 17p13           | 4                             | 1 - 433-2 (intron 2 acceptor site)                | 3 - (Y231X) rs12948217, (E285A) rs28940279, (A305E) rs28940574                                                                                                                      | 3                 |                                        |                                                         |                                       |                                                                |
| Carnitine Palmitoyl-transferase IA (liver) Deficiency | <i>CPT1A</i>    | 11q13.1-q13.2   | 2                             | 2 - P479L, G710E                                  | 0                                                                                                                                                                                   | 0                 |                                        |                                                         |                                       |                                                                |
| Carnitine Palmitoyl-transferase II                    | <i>CPT2</i>     | 1p32            | 14                            | 12 - S38fs, S113L,                                | 2 - (P50H) rs28936375, (Y628S) rs28936673                                                                                                                                           | 2                 |                                        |                                                         |                                       |                                                                |

Supplement to Notifiable genetic variants on commercially-available SNP arrays

|                                              |               |              |     |                                                                                                                             |                                                                                                  |   |                                   |                                         |                                               |                                         |
|----------------------------------------------|---------------|--------------|-----|-----------------------------------------------------------------------------------------------------------------------------|--------------------------------------------------------------------------------------------------|---|-----------------------------------|-----------------------------------------|-----------------------------------------------|-----------------------------------------|
| Deficiency                                   |               |              |     | R124x,<br>L178F,<br>M214T,<br>P227L,<br>Q413fs,<br>R503C,<br>G549D,<br>Q550R,<br>P604S,<br>R631C.                           |                                                                                                  |   |                                   |                                         |                                               |                                         |
| CFTR-Related Disorders                       | <i>CFTR</i>   | 7q31.2       | 16  | 12 - R347P,<br>G85E,<br>R117H,<br>Q359K,<br>G542X,<br>S549R,<br>G551D,<br>R553X,<br>W1089X,<br>D1152H,<br>W1282X,<br>N1303K | 4 - (F508) rs332, (I148T) rs35516286,<br>(I507V) rs1801178, (M1101K)<br>rs36210737               | 4 |                                   |                                         |                                               |                                         |
| Colon Cancer (APC I1307K related)            | <i>APC</i>    | 5q21-q22     | 2   | 0                                                                                                                           | 2 - (I1307K) rs1801165, (E1317Q)<br>rs1801166                                                    | 2 |                                   |                                         |                                               |                                         |
| Cystinosis                                   | <i>CTNS</i>   | 17p13        | 5   | 5 - W138x,<br>L158P,<br>D205N,<br>1035insC,<br>537del21                                                                     | 0                                                                                                | 0 |                                   |                                         |                                               |                                         |
| Diabetes and Hearing Loss                    | <i>MTTL1</i>  | M            | n/a |                                                                                                                             |                                                                                                  |   |                                   |                                         |                                               |                                         |
| Dentatorubral-Pallidoluysian Atrophy (DRPLA) | <i>ATN1</i>   | 12p13.31     | 0   | 0                                                                                                                           | 0                                                                                                | 0 |                                   |                                         |                                               |                                         |
| Early-Onset Primary Dystonia (DYT1)          | <i>TOR1A</i>  | 9q34         | 1   | 1 - 302Edel                                                                                                                 | 0                                                                                                | 0 |                                   |                                         |                                               |                                         |
| Factor V Leiden Thrombophilia                | <i>F5</i>     | 1q23         | 1   | 0                                                                                                                           | 1 -(R506Q) rs6025                                                                                | 1 | (R506Q)<br>rs6025                 | (rs6025)<br>IM,IMD,IBC                  | (rs6025):<br>rs1894692,<br>r <sup>2</sup> =1  |                                         |
| Factor V R2 Mutation Thrombophilia           | <i>F5</i>     | 1q23         | 1   | 0                                                                                                                           | 1 - (H1299R) rs1800595                                                                           | 1 |                                   |                                         |                                               |                                         |
| Familial Adenomatous Polyposis               | <i>MUTYH</i>  | 1p34.3-p32.1 | 3   | 1- A459D                                                                                                                    | 2 - (Y165C) rs34612342, (G382D)<br>rs36053993                                                    | 2 |                                   |                                         |                                               |                                         |
| Familial Dysautonomia                        | <i>IKBKAP</i> | 9q31         | 5   | 4 - R696P,<br>IVS20(+6)T<br>>C,<br>2507+6T>C,<br>2204 +6T>C                                                                 | 1 - (P914L) rs28939712                                                                           | 1 |                                   |                                         |                                               |                                         |
| Familial Mediterranean Fever                 | <i>MEFV</i>   | 16p13.3      | 14  | 8 -<br>E167D/G16<br>7A, T267I,                                                                                              | 6 - (E148Q) rs3743930, (P369S)<br>rs11466023, (R408Q) rs11466024,<br>(M680I) rs28940580, (M694I) | 6 | (P369S)<br>rs11466023;<br>(R408Q) | (rs11466023)<br>AG,IBC;<br>(rs11466024) | (rs11466023)<br>: rs11466024;<br>(rs11466024) | (rs11466024)<br>AG,IBC;<br>(rs11466023) |

Supplement to Notifiable genetic variants on commercially-available SNP arrays

|                                                                        |              |                  |    |                                                                                                                   |                                              |   |                                               |                                                  |                                                  |                        |
|------------------------------------------------------------------------|--------------|------------------|----|-------------------------------------------------------------------------------------------------------------------|----------------------------------------------|---|-----------------------------------------------|--------------------------------------------------|--------------------------------------------------|------------------------|
|                                                                        |              |                  |    | F579L,<br>I692del,<br>M694V,<br>K695R,<br>A744S,<br>R761H                                                         | rs28940578, (V726A) rs28940579               |   | rs11466024                                    | AG,IBC                                           | : rs11466023                                     | AG,IBC                 |
| FANCC-Related<br>Fanconi Anemia                                        | <i>FANCC</i> | 9q22.3           | 5  | 5 - Q13X,<br>IVS4+4,<br>322delG,<br>Arg548X,<br>Leu554Pro                                                         | 0                                            | 0 |                                               |                                                  |                                                  |                        |
| FGFR1-Related<br>Craniosynostosis<br>Syndromes                         | <i>FGFR1</i> | 8p11.2-<br>p11.1 | 1  | 1 - P252R                                                                                                         | 0                                            | 0 |                                               |                                                  |                                                  |                        |
| FGFR2-Related<br>Craniosynostosis<br>Syndromes                         | <i>FGFR2</i> | 10q26            | 2  | 2 - S252W,<br>P253R                                                                                               | 0                                            | 0 |                                               |                                                  |                                                  |                        |
| FGFR3-Related<br>Craniosynostosis<br>Syndromes                         | <i>FGFR3</i> | 4p16.3           | 2  | 0                                                                                                                 | 2 - (P250R) rs4647924, (A391E)<br>rs28931615 | 2 |                                               |                                                  |                                                  |                        |
| FRAXE Syndrome                                                         | <i>FMR1</i>  | Xq27.3           | 0  | 0                                                                                                                 | 0                                            | 0 |                                               |                                                  |                                                  |                        |
| Friedreich Ataxia                                                      | <i>FXN</i>   | 9q13-<br>q21.1   | 0  | 0                                                                                                                 | 0                                            | 0 |                                               |                                                  |                                                  |                        |
| Galactosemia                                                           | <i>GALT</i>  | 9p13             | 12 | 10 - S135L,<br>T138M,<br>Q169K,<br>Q188R,<br>L195P,<br>Y209C,<br>K285N,<br>X380R,<br>IVS2-2,<br>5'UTR -<br>119del | 2 - (L218L) rs2070075, (N314D)<br>rs2070074  | 2 | (N314D)<br>rs2070074;<br>(L218L)<br>rs2070075 | (rs2070074)<br>A6,I3,I5,I6,I6Q,IM,<br>IMD,IC,ICQ | (rs2070075):<br>rs12553321,<br>r <sup>2</sup> =1 | (rs12553321)<br>IM,IMD |
| Gaucher Disease                                                        | <i>GBA</i>   | 1q21             | 8  | 6 - 84Gins,<br>IVS2+1G>A,<br>N370S,<br>V394L,<br>R463C/H,<br>R496H                                                | 2 - (D409H) rs1064651, (L444P)<br>rs35095275 | 2 |                                               |                                                  |                                                  |                        |
| GJB2-Related<br>DFNA 3<br>Nonsyndromic<br>Hearing Loss and<br>Deafness | <i>GJB2</i>  | 13q11-<br>q12    | 0  | 1- 35delG                                                                                                         | 0                                            | 0 |                                               |                                                  |                                                  |                        |
| GJB2-Related<br>DFNB 1<br>Nonsyndromic<br>Hearing Loss and<br>Deafness | <i>GJB2</i>  | 13q11-<br>q12    | 11 | 10 - W24X,<br>M34T,<br>W77X/R,<br>167delT,<br>235delC,<br>101delAG,<br>R184P,<br>V37I,<br>313del14,<br>delE120    | 1 - (35delG) rs1801002                       | 1 |                                               |                                                  |                                                  |                        |

Supplement to Notifiable genetic variants on commercially-available SNP arrays

|                                                            |               |           |   |                                                                                   |                                                                                                                     |   |                                     |                                                                             |                                                                |                                                                        |
|------------------------------------------------------------|---------------|-----------|---|-----------------------------------------------------------------------------------|---------------------------------------------------------------------------------------------------------------------|---|-------------------------------------|-----------------------------------------------------------------------------|----------------------------------------------------------------|------------------------------------------------------------------------|
| GJB6-Related DFNB 1 Nonsyndromic Hearing Loss and Deafness | <i>GJB6</i>   | 13q12     | 1 | 1- D13S1830 (del)                                                                 | 0                                                                                                                   | 0 |                                     |                                                                             |                                                                |                                                                        |
| Glucose-6-Phosphate Dehydrogenase Deficiency               | <i>G6PD</i>   | Xq28      | 5 | 1- 1376G>T (R459L)                                                                | 4 - (V68M) rs1050828, (N128D) rs1050829, (S188F) rs5030868, (A225T) rs5030869                                       | 4 | (G202A) rs1050828                   | (rs1050828) A6,I1,IM,IMD,IBC                                                |                                                                |                                                                        |
| Glycogen Storage Disease Type 1a                           | <i>G6PC</i>   | 17q21     | 5 | 4 - Q27delC (fs), 130x, delF327 (459insTA), Q347X                                 | 1 - (R83C) rs1801175                                                                                                | 1 |                                     |                                                                             |                                                                |                                                                        |
| Glycogen Storage Disease Type V                            | <i>PYGM</i>   | 11q13     | 3 | 3 - R49X, G204S, K542T                                                            | 0                                                                                                                   | 0 |                                     |                                                                             |                                                                |                                                                        |
| Hemoglobin Constant Spring                                 | <i>HBA2</i>   | 16p13.3   | 0 | 0                                                                                 | 1- (X143E) rs41464951                                                                                               | 1 |                                     |                                                                             |                                                                |                                                                        |
| Hemoglobin E                                               | <i>HBB</i>    | 11p15.5   | 0 | 0                                                                                 | 2- (E121Q) rs3394627, (E26K) rs33950507                                                                             | 2 |                                     |                                                                             |                                                                |                                                                        |
| Hemoglobin S Beta-Thalassemia                              | <i>HBB</i>    | 11p15.5   | 1 | 1- c.20A>T                                                                        | 0                                                                                                                   | 0 |                                     |                                                                             |                                                                |                                                                        |
| Hemoglobin SC                                              | <i>HBB</i>    | 11p15.5   | 0 | 0                                                                                 | 1- (E6K) rs33030165                                                                                                 | 1 |                                     |                                                                             |                                                                |                                                                        |
| Hemoglobin SS                                              | <i>HBB</i>    | 11p15.5   | 0 | 0                                                                                 | 1- (E6V) rs334                                                                                                      | 1 | (Glu6Val) rs334                     |                                                                             |                                                                |                                                                        |
| Hemophilia A                                               | <i>F8</i>     | Xq28      | 0 | 0                                                                                 | 0                                                                                                                   | 0 |                                     |                                                                             |                                                                |                                                                        |
| Hereditary Fructose Intolerance                            | <i>ALDOB</i>  | 22q13.1   | 4 | 3 - A174D, Y203X, N334X                                                           | 1 - (A149P) rs1800546                                                                                               | 1 |                                     |                                                                             |                                                                |                                                                        |
| Hereditary Non-Polyposis Colon Cancer                      | <i>MLH1</i>   | 3p21.3    | 2 | 2- 454-1G>A, 320T>G                                                               | 0                                                                                                                   | 0 |                                     |                                                                             |                                                                |                                                                        |
| Hereditary Pancreatitis                                    | <i>PRSS1</i>  | 7q34      | 3 | 3- A16V, R122H, N291I                                                             | 0                                                                                                                   | 0 |                                     |                                                                             |                                                                |                                                                        |
|                                                            | <i>SPINK1</i> | 5q32      | 2 | 0                                                                                 | 2 - (M1T) rs28935768, (N34S) rs17107315                                                                             | 2 | (N34S) rs17107315                   | (rs17107315) AG,IM,IMD                                                      |                                                                |                                                                        |
| Hexosaminidase A Deficiency                                | <i>HEXA</i>   | 15q23-q24 | 9 | 8 - R247W, R249W, G269S, 1278insTAT C, IVS7+1G>A, IVS9+1G>A, IVS12(+1)G >C, G805A | 1 - (R178L) rs28941770                                                                                              | 1 |                                     |                                                                             |                                                                |                                                                        |
| HFE- Associated Hereditary Hemochromatosis                 | <i>HFE</i>    | 6p21.3    | 8 | 2- E168Q/X, W169X                                                                 | 6 - (H63D) rs1799945, (S65C) rs1800730, (V53M) rs28934889, (V59M) rs28934890, (Q127H) rs28934595, (C282Y) rs1800562 | 6 | (H63D) rs1799945; (C282Y) rs1800562 | (rs1799945) IM,IMD,IBC; (rs1800562) AS,A5,A6,I3,I5,I6,I6Q,IM,IMD,IC,ICQ,IBC | (rs1799945): rs198846, r^2=1; rs129128, r^2=1; rs198833, r^2=1 | (rs198846): I6,IM,IMD; (rs129128): AN,A5,A6,I3,I5,I6,I6Q,IM,IMD,IC,ICQ |
| Homocystinuria                                             | <i>CBS</i>    | 21q22.3   | 2 | 1- G307S                                                                          | 1 - (I278T) rs5742905                                                                                               | 1 |                                     |                                                                             |                                                                |                                                                        |

Supplement to Notifiable genetic variants on commercially-available SNP arrays

|                                                                    |                             |           |     |                                                                                         |                                                                |   |                      |  |  |  |
|--------------------------------------------------------------------|-----------------------------|-----------|-----|-----------------------------------------------------------------------------------------|----------------------------------------------------------------|---|----------------------|--|--|--|
| Caused by Cystathionine Beta-Synthase Deficiency                   |                             |           |     |                                                                                         |                                                                |   |                      |  |  |  |
| Huntington Disease                                                 | <i>HD</i>                   | 4p16.3    | 0   | 0                                                                                       | 0                                                              | 0 |                      |  |  |  |
| Hyperlipoproteinemia Type III/ Familial Dysbeta-lipoproteinemia    | <i>ApoE</i>                 | 19q13.2   | 2   | 0                                                                                       | 2 - (C112R) rs429358, (C158R) rs7412                           | 2 | (Cys112Arg) rs429358 |  |  |  |
| Hyperornithinemia-Hyperammonemia-Homocitrullinuria Syndrome        | <i>SLC25A15</i>             | 13q14     | 1   | 1 - F188del                                                                             | 0                                                              | 0 |                      |  |  |  |
| Hypochondroplasia                                                  | <i>FGFR3</i>                | 4p16.3    | 9   | 6 - Asn328Ile, Ile538Val, N540T, N540S, K650M, K650Q                                    | 3 - (G380R) rs28931614, (N540K) rs28933068, (K650N) rs28928868 | 3 |                      |  |  |  |
| Infantile Myopathy and Lactic Acidosis (Fatal and Non-Fatal Forms) | <i>MTT1</i>                 | M         | n/a |                                                                                         |                                                                |   |                      |  |  |  |
| Isovaleric Acidemia                                                | <i>IVD</i>                  | 15q14-q15 | 1   | 0                                                                                       | 1 - (A282V) rs28940889                                         | 1 |                      |  |  |  |
| Krabbe Disease                                                     | <i>GALC</i>                 | 14q31     | 0   | 0                                                                                       | 0                                                              | 0 |                      |  |  |  |
| Long Chain 3-Hydroxyacyl-CoA Dehydrogenase Deficiency              | <i>HADHA</i>                | 2p23      | 3   | 3 - E474Q, E10Q, Q342X                                                                  | 0                                                              | 0 |                      |  |  |  |
| Medium Chain Acyl-Coenzyme A Dehydrogenase Deficiency              | <i>ACADM</i>                | 1p31      | 9   | 9 - Y42H, K304E, K329E, R206C (250C>T), G267R (799G>A), 503A>G, 583 G>A, 616C>T, 617G>A | 0                                                              | 0 |                      |  |  |  |
| MELAS Syndrome                                                     | <i>MTTL1</i>                | M         | n/a |                                                                                         |                                                                |   |                      |  |  |  |
| MERRF (Myoclonic Epilepsy associated with Ragged Red Fibers)       | <i>MTTH</i>                 | M         | n/a |                                                                                         |                                                                |   |                      |  |  |  |
| Metachromatic Leukodystrophy                                       | <i>ARSA</i>                 | 22q13.31  | 2   | 1- 459+1G>A (SDEx2+1)                                                                   | 1- (P426L) rs28940893                                          | 1 |                      |  |  |  |
| Mitochondrial DNA-Associated Leigh Syndrome and                    | <i>MTATP6, MTTL1, MTTK,</i> | M         | n/a |                                                                                         |                                                                |   |                      |  |  |  |

Supplement to Notifiable genetic variants on commercially-available SNP arrays

|                                                         |                                                             |               |     |                                                               |                                                                                                                                                                                          |   |                                      |                                                                                 |                                           |                 |
|---------------------------------------------------------|-------------------------------------------------------------|---------------|-----|---------------------------------------------------------------|------------------------------------------------------------------------------------------------------------------------------------------------------------------------------------------|---|--------------------------------------|---------------------------------------------------------------------------------|-------------------------------------------|-----------------|
| NARP                                                    | <i>MTND1, MTND3, MTND4, MTND5, MTND6, MTCO3, MTTW, MTTV</i> |               |     |                                                               |                                                                                                                                                                                          |   |                                      |                                                                                 |                                           |                 |
| MTHFR Deficiency and Thermolabile Variant               | <i>MTHFR</i>                                                | 1p36.3        | 2   | 0                                                             | 2 - (A222V) rs1801133, (E429A) rs1801131                                                                                                                                                 | 2 | (A222V) rs1801133; (E429A) rs1801131 | (rs1801133) AH,I1,I3,I5,I6,I6Q, IM,IMD,IC,ICQ,IBC (rs1801131) A6,I6Q,IM,IMD,IBC | (rs1801131): rs4846049, r <sup>2</sup> =1 | (rs4846049) IBC |
| MTRNR1-Related Hearing Loss and Deafness                | <i>MTRNR1</i>                                               | M             | n/a |                                                               |                                                                                                                                                                                          |   |                                      |                                                                                 |                                           |                 |
| MTTS1-Related Hearing Loss and Deafness                 | <i>MTTS1</i>                                                | M             | n/a |                                                               |                                                                                                                                                                                          |   |                                      |                                                                                 |                                           |                 |
| Mucopolipidosis IV                                      | <i>MCOLN1</i>                                               | 19p13.3-p13.2 | 6   | 6 - IVS3(-2)A>G, 5534A>G, 406-2A>G, 511_6943del, T232P, D362Y | 0                                                                                                                                                                                        | 0 |                                      |                                                                                 |                                           |                 |
| Multiple Endocrine Neoplasia Type 2                     | <i>RET</i>                                                  | 10q11.2       | 4   | 4 - C618R (or others), E768D, A883F, M918T                    | 0                                                                                                                                                                                        | 0 |                                      |                                                                                 |                                           |                 |
| Myotonic Dystrophy Type 1                               | <i>DMPK</i>                                                 | 19q13.2-q13.3 | 0   | 0                                                             | 0                                                                                                                                                                                        | 0 |                                      |                                                                                 |                                           |                 |
| Niemann-Pick Disease Due to Sphingomyelinase Deficiency | <i>SMPD1</i>                                                | 11p15.4-p15.1 | 7   | 7 - L302P, P330fs, N370S, L444P, 84insG, R496L, R608del       | 0                                                                                                                                                                                        | 0 |                                      |                                                                                 |                                           |                 |
| Phenylalanine Hydroxylase Deficiency                    | <i>PAH</i>                                                  | 12q23.2       | 11  | 2 - I65T, G272x                                               | 9 - (L48S) rs5030841, (R158Q) rs5030843, (R261X) rs5030850, (R261Q) rs5030849, (R408W) rs5030858, (R408Q) rs5030859, (Y414C) rs5030860, (IVS10int-546) rs5030855, (IVS12+1G>A) rs5030861 | 9 | (R261Q) rs5030849                    |                                                                                 |                                           |                 |
| Plasminogen Activator Inhibitor I                       | <i>SERPINE1</i>                                             | 7q21.3-q22    | 1   | 0                                                             | 1 - 4G/5G (rs1799762)                                                                                                                                                                    | 1 |                                      |                                                                                 |                                           |                 |
| Prader-Willi Syndrome                                   | <i>PWCR</i>                                                 | 15q11-q13     | 0   | 0                                                             | 0                                                                                                                                                                                        | 0 |                                      |                                                                                 |                                           |                 |
| Prothrombin G20210A Thrombophilia                       | <i>F2</i>                                                   | 11p11         | 1   | 0                                                             | 1 - 3'(UTR SNP) rs1799963                                                                                                                                                                | 1 |                                      |                                                                                 |                                           |                 |
| Rett Syndrome                                           | <i>MECP2</i>                                                | Xq28          | 14  | 9 - S134C, P152R,                                             | 5 - (R106W) rs28934907, (R133C) rs28934904, (A140V) rs28934908,                                                                                                                          | 5 |                                      |                                                                                 |                                           |                 |

Supplement to Notifiable genetic variants on commercially-available SNP arrays

|                                    |                |              |    |                                                                                                                                    |                                           |   |  |  |  |  |
|------------------------------------|----------------|--------------|----|------------------------------------------------------------------------------------------------------------------------------------|-------------------------------------------|---|--|--|--|--|
|                                    |                |              |    | R168x,<br>P225R,<br>R255x,<br>G269fs,<br>R270x,<br>R294x,<br>R306x                                                                 | (T158M) rs28934906, (R306C)<br>rs28935468 |   |  |  |  |  |
| Smith-Lemli-Opitz Syndrome         | <i>DHCR7</i>   | 11q12-q13    | 11 | 11 - T93M,<br>L109P,<br>W151X,<br>L157P,<br>V326L,<br>R352W,<br>R352Q,<br>C380Y,<br>R404C,<br>R446Q,<br>IVS8-1G>C                  | 0                                         | 0 |  |  |  |  |
| Spinal and Bulbar Muscular Atrophy | <i>AR</i>      | Xq11-q12     | 0  | 0                                                                                                                                  | 0                                         | 0 |  |  |  |  |
| Spinal Muscular Atrophy            | <i>SMN1</i>    | 5q12.2-q13.3 | 0  | 0                                                                                                                                  | 0                                         | 0 |  |  |  |  |
| Spinocerebellar Ataxia Type 1      | <i>ATXN1</i>   | 6p23         | 0  | 0                                                                                                                                  | 0                                         | 0 |  |  |  |  |
| Spinocerebellar Ataxia Type 2      | <i>ATXN2</i>   | 12q24        | 0  | 0                                                                                                                                  | 0                                         | 0 |  |  |  |  |
| Spinocerebellar Ataxia Type 3      | <i>ATXN3</i>   | 14q24.3-q31  | 0  | 0                                                                                                                                  | 0                                         | 0 |  |  |  |  |
| Spinocerebellar Ataxia Type 6      | <i>CACNA1A</i> | 19p13        | 0  | 0                                                                                                                                  | 0                                         | 0 |  |  |  |  |
| Spinocerebellar Ataxia Type 7      | <i>ATXN7</i>   | 3p21.1-p12   | 0  | 0                                                                                                                                  | 0                                         | 0 |  |  |  |  |
| Spinocerebellar Ataxia Type 8      | <i>ATXN8</i>   | 13q21        | 0  | 0                                                                                                                                  | 0                                         | 0 |  |  |  |  |
| Spinocerebellar Ataxia Type10      | <i>ATXN10</i>  | 22q13        | 0  | 0                                                                                                                                  | 0                                         | 0 |  |  |  |  |
| Thanatophoric Dysplasia            | <i>FGFR3</i>   | 4p16.3       | 13 | 13 - R248C,<br>S249C,<br>G370C,<br>S371C,<br>Y373C,<br>K650M,<br>K650E,<br>X807G,<br>X807R,<br>X807L,<br>X807S,<br>X807C,<br>X807W | 0                                         | 0 |  |  |  |  |
| Tyrosinemia Type I                 | <i>FAH</i>     | 15q23-q25    | 5  | 5- Q64H,<br>P261L,<br>W262X,<br>G337S,<br>E357X                                                                                    | 0                                         | 0 |  |  |  |  |
| Von Willebrand                     | <i>VWF</i>     | 12p13.3      | 0  | 0                                                                                                                                  | 0                                         | 0 |  |  |  |  |

Supplement to Notifiable genetic variants on commercially-available SNP arrays

|                       |     |        |   |   |   |   |  |  |  |  |  |  |
|-----------------------|-----|--------|---|---|---|---|--|--|--|--|--|--|
| Disease               |     |        |   |   |   |   |  |  |  |  |  |  |
| XX Male Syndrome      | SRY | Yp11.3 | 0 | 0 | 0 | 0 |  |  |  |  |  |  |
| XY Gonadal Dysgenesis | SRY | Yp11.4 | 0 | 0 | 0 | 0 |  |  |  |  |  |  |

**Supplemental Table 2. Information on NHGRI GWAS catalog of variants associated with common diseases.** This catalog includes only SNPs with p-values for association  $< 9.5 \times 10^{-6}$  from GWAS assaying  $\geq 100,000$  variants.

| Disease                            | Gene             | SNPid                     | SNP Genotyping Arrays                      | AA   | Ab   | bb    | FHS MAF | Risk allele (if given) | CEU   | CHB   | JPT   | YRI   |
|------------------------------------|------------------|---------------------------|--------------------------------------------|------|------|-------|---------|------------------------|-------|-------|-------|-------|
| Bone and Musculoskeletal Disorders |                  |                           |                                            |      |      |       |         |                        |       |       |       |       |
| Knee osteoarthritis                | PTGS2, PLA2G4A   | rs4140564                 | I3,I5,I6,I6Q,IM,IMD,IC,ICQ                 |      |      |       | 0.059   | -                      | 0.076 | 0.000 | 0.000 | 0.076 |
| Rheumatoid arthritis               | TNFAIP3, OLIG3   | rs10499194                | AX                                         |      |      |       | 0.292   | C                      | 0.175 | 0.011 | 0.091 | 0.100 |
|                                    | TRAF1-C5         | rs3761847                 | I1,I3,I5,I6,I6Q,IM,IMD,IC,ICQ              |      |      |       | 0.583   | G                      | 0.483 | 0.511 | 0.545 | 0.350 |
|                                    | Intergenic       | rs11761231                | AN,A5,A6,IM,IMD,IBC                        | 3616 | 3740 | 1012  | 0.344   | C                      | 0.400 | 0.767 | 0.711 | 0.183 |
|                                    |                  | rs743777                  | AS,A6,IBC                                  | 3796 | 3688 | 837   | 0.322   | G                      | 0.275 | 0.133 | 0.102 | 0.575 |
|                                    |                  | rs2837960                 | AN,A5,A6,I3,I5,I6,I6Q,IM,IMD,IC,ICQ,IBC    | 5167 | 2607 | 434   | 0.212   | G                      | 0.102 | 0.216 | 0.125 | 0.250 |
|                                    | rs3816587        | AX,AS,A5,A6,I1,IM,IMD,IBC | 2801                                       | 4131 | 1450 | 0.419 | C       | 0.442                  | 0.656 | 0.722 | 0.542 |       |
| Restless legs syndrome             | BTBD9            | rs3923809                 | AG,I3,I5,I6,I6Q,IM,IMD,IC,ICQ,IBC          | 3863 | 3524 | 809   | 0.314   | A                      | 0.259 | 0.651 | 0.640 | 0.342 |
|                                    | MEIS1            | rs2300478                 | AS,A5,A6,I3,I5,I6,I6Q,IM,IMD,IC,ICQ,IBC    | 4664 | 3126 | 554   | 0.254   | G                      | 0.242 | 0.222 | 0.273 | 0.125 |
|                                    | BTBD9            | rs9296249                 | AX,AN,A5,A6,I2,I5,I6,I6Q,IM,IMD,IBC        | 5051 | 2921 | 412   | 0.223   | T                      | 0.200 | 0.544 | 0.500 | 0.458 |
|                                    | MAP2K5, LBXCOR1  | rs12593813                | AS,A5,A6,I2,I5,I6,I6Q,IM,IMD               | 3966 | 3538 | 880   | 0.316   | G                      | 0.317 | 0.614 | 0.678 | 0.842 |
| Cardiovascular Diseases            |                  |                           |                                            |      |      |       |         |                        |       |       |       |       |
| Coronary spasm in women            |                  | rs10498345                |                                            |      |      |       | 0.000   | T                      | 0.000 | 0.189 | 0.221 | 0.138 |
| Atrial fibrillation                | Intergenic       | rs958546                  | AH,A6                                      |      |      |       | 0.293   | -                      | 0.381 | 0.311 | 0.364 | 0.342 |
|                                    | KIAA1598         | rs4776472                 | AH,A6                                      |      |      |       | 0.241   | -                      | 0.242 | 0.474 | 0.569 | 0.043 |
|                                    | CNTN5            | rs10501920                | AH,AS,A5,A6                                | 6534 | 1728 | 109   | 0.116   | -                      | 0.092 | 0.167 | 0.189 | 0.225 |
| Heart failure                      | KIAA1598         | rs740363                  | AH,AN,A5,A6,I3,I5,I6,I6Q,IM,IMD,IC,ICQ     | 2319 | 4166 | 1882  | 0.474   | -                      | 0.458 | 0.089 | 0.091 | 0.333 |
| Major CVD                          | Intergenic       | rs499818                  | AH,I3,I5,I6,I6Q,IM,IMD,IC,ICQ              |      |      |       | 0.279   | -                      | 0.208 | 0.122 | 0.091 | 0.058 |
| Coronary disease                   | CDKN2A, CDKN2B   | rs1333049                 | AN,A5,A6,IBC                               | 2137 | 4229 | 1924  | 0.487   | C                      | 0.492 | 0.478 | 0.511 | 0.175 |
|                                    |                  | rs17672135                | AN,A5,A6,IBC                               | 6542 | 1677 | 104   | 0.113   | C                      | 0.150 | 0.089 | 0.144 | 0.092 |
|                                    |                  | rs688034                  | AN,A5,A6,IBC                               | 3712 | 3663 | 892   | 0.329   | T                      | 0.291 | 0.000 | 0.000 | 0.058 |
|                                    |                  | rs8055236                 | AN,A5,A6,I3,I5,I6,I6Q,IM,IMD,IC,ICQ,IBC    | 5555 | 2499 | 278   | 0.183   | G                      | 0.208 | 0.111 | 0.167 | 0.608 |
|                                    | MTHFD1L          | rs6922269                 | AX,AN,A5,A6,I3,I5,I6,I6Q,IM,IMD,IC,ICQ     | 4535 | 3253 | 588   | 0.264   | A                      | 0.300 | 0.022 | 0.011 | 0.725 |
|                                    | Pseudogene       | rs2943634                 | AN,A5,A6,IBC                               | 3632 | 3733 | 990   | 0.342   | C                      | 0.358 | 0.133 | 0.089 | 0.608 |
| Atrial fibrillation/atrial flutter | PITX2, ENPEP     | rs2200733                 | AX,AS,A5,A6,I3,I5,I6,I6Q,IM,IMD,IC,ICQ,IBC | 6283 | 1865 | 170   | 0.133   | T                      | 0.117 | 0.422 | 0.467 | 0.300 |
|                                    |                  | rs10033464                | I1,I3,I5,I6,I6Q,IM,IMD,IC,ICQ,IBC          |      |      |       | 0.091   | T                      | 0.117 | 0.233 | 0.209 | 0.250 |
| Hypertension                       | RYR2, CHRM3, ZP4 | rs2820037                 | AS,A5,A6,IBC                               | 5754 | 2385 | 245   | 0.171   | T                      | 0.158 | 0.100 | 0.033 | 0.433 |
|                                    |                  | rs2398162                 | AS,A5,A6,IM,IMD,IBC                        | 4932 | 2853 | 431   | 0.226   | A                      | 0.217 | 0.633 | 0.625 | 0.100 |
| Stroke                             | IMPA2            | rs7506045                 | AS,A5,A6,I3,I5,I6,I6Q,IM,IMD,IC,ICQ        | 6843 | 1299 | 78    | 0.089   | -                      | 0.075 | 0.333 | 0.167 | 0.167 |
|                                    | Intergenic       | rs10486776                | AX,I3,I5,I6,I6Q,IM,IMD,IC,ICQ              |      |      |       | 0.074   | -                      | 0.058 | 0.178 | 0.070 | 0.000 |
|                                    | AIM1             | rs783396                  | AG,A6,I3,I5,I6,I6Q,IM,IMD,IC,ICQ           | 7086 | 1206 | 78    | 0.081   | -                      | 0.067 | 0.033 | 0.080 | 0.100 |
| Myocardial infarction              | CDKN2A, CDKN2B   | rs10757278                | IBC                                        |      |      |       | 0.509   | G                      | 0.500 | 0.474 | 0.528 | 0.051 |
| Respiratory Disorders              |                  |                           |                                            |      |      |       |         |                        |       |       |       |       |
| Childhood                          | Intergenic       | rs7216389                 | I3,I5,I6,I6Q,IM,IMD,IC,ICQ                 |      |      |       | 0.512   | T                      | 0.483 | 0.611 | 0.711 | 0.875 |



Supplement to Notifiable genetic variants on commercially-available SNP arrays

|                                 |                                          |            |                                            |      |      |      |       |   |       |       |       |       |  |  |
|---------------------------------|------------------------------------------|------------|--------------------------------------------|------|------|------|-------|---|-------|-------|-------|-------|--|--|
| asthma,<br>ORMDL3<br>expression |                                          |            |                                            |      |      |      |       |   |       |       |       |       |  |  |
| Cancer                          |                                          |            |                                            |      |      |      |       |   |       |       |       |       |  |  |
| Breast cancer                   | ECHDC1,RNF146                            | rs2180341  | AN,A5,A6                                   | 4864 | 3002 | 515  | 0.241 | G | 0.275 | 0.267 | 0.211 | 0.342 |  |  |
|                                 | COLIA1                                   | rs2075555  | AX,AS,A5,A6,I3,I5,I6,I6Q,IM,IMD,IC,ICQ,IBC | 6200 | 2024 | 150  | 0.139 | - | 0.183 | 0.411 | 0.367 | 0.233 |  |  |
|                                 | Intergenic                               | rs6556756  | AH,AN,A5,A6,IM,IMD                         | 6365 | 1742 | 113  | 0.120 | - | 0.100 | 0.400 | 0.500 | 0.025 |  |  |
|                                 | Intergenic                               | rs1154865  | AH                                         |      |      |      | 0.223 | - | 0.153 | 0.211 | 0.122 | 0.275 |  |  |
|                                 | Intergenic                               | rs1978503  | AH,AS,A5,A6,I3,I5,I6,I6Q,IM,IMD,IC,ICQ     | 5480 | 2542 | 322  | 0.191 | - | 0.167 | 0.189 | 0.136 | 0.192 |  |  |
|                                 | ABCC4                                    | rs1926657  | AX,A6,I6Q,IM,IMD,IBC                       |      |      |      | 0.172 | - | 0.158 | 0.422 | 0.386 | 0.417 |  |  |
|                                 | FGFR2                                    | rs2981582  | A6,IM,IMD                                  |      |      |      | 0.416 | G | 0.417 | 0.300 | 0.200 | 0.517 |  |  |
|                                 | TNCR9,LOC6,43714                         | rs3803662  | AS,A5,A6,I3,I5,I6,I6Q,IM,IMD,IC,ICQ        | 4347 | 3331 | 669  | 0.280 | C | 0.300 | 0.711 | 0.556 | 0.533 |  |  |
|                                 | MAP3K1                                   | rs889312   | I6Q,IMD,ICQ                                |      |      |      | 0.279 | A | 0.308 | 0.500 | 0.545 | 0.328 |  |  |
|                                 | Intergenic                               | rs13281615 | I6Q,IMD,ICQ                                |      |      |      | 0.418 | T | 0.458 | 0.568 | 0.611 | 0.433 |  |  |
|                                 | LSP1                                     | rs3817198  | AS,A5,A6,I2,I5,I6,I6Q,IM,IMD,IBC           | 3901 | 3628 | 832  | 0.316 | T | 0.342 | 0.100 | 0.144 | 0.125 |  |  |
|                                 | FGFR2                                    | rs1219648  | A6,I3,I5,I6,I6Q,IM,IMD,IC,ICQ              |      |      |      | 0.418 | G | 0.417 | 0.367 | 0.295 | 0.467 |  |  |
|                                 | TNRC9                                    | rs3803662  | AS,A5,A6,I3,I5,I6,I6Q,IM,IMD,IC,ICQ        | 4347 | 3331 | 669  | 0.280 | C | 0.300 | 0.711 | 0.556 | 0.533 |  |  |
|                                 | Intergenic                               | rs13387042 | I3,I5,I6,I6Q,IM,IMD,IC,ICQ                 |      |      |      | 0.481 | A | 0.633 | 0.133 | 0.111 | 0.775 |  |  |
| Colorectal cancer               | DQ515897                                 | rs7014346  | AS,A5,A6,I3,I5,I6,I6Q,IM,IMD,IC,ICQ        | 3433 | 3853 | 1090 | 0.360 | A | 0.267 | 0.356 | 0.216 | 0.467 |  |  |
|                                 | Intergenic                               | rs3802842  | I3,I5,I6,I6Q,IM,IMD,IC,ICQ                 |      |      |      | 0.293 | C | 0.242 | 0.375 | 0.300 | 0.342 |  |  |
|                                 | SMAD7                                    | rs4939827  | I3,I5,I6,I6Q,IM,IMD,IC,ICQ                 |      |      |      | 0.468 | T | 0.492 | 0.744 | 0.795 | 0.767 |  |  |
|                                 | Intergenic                               | rs10795668 | I2,I5,I6,I6Q,IM,IMD                        |      |      |      | 0.327 | C | 0.362 | 0.352 | 0.405 | 0.008 |  |  |
|                                 | EIF3H                                    | rs16892766 | AS,A6,I2,I5,I6,I6Q,IM,IMD                  | 7132 | 636  | 249  | 0.071 | A | 0.117 | 0.000 | 0.000 | 0.229 |  |  |
|                                 | SMAD7                                    | rs4939827  | I3,I5,I6,I6Q,IM,IMD,IC,ICQ                 |      |      |      | 0.468 | T | 0.492 | 0.744 | 0.795 | 0.767 |  |  |
|                                 | Intergenic                               | rs6983267  | A6,I3,I5,I6,I6Q,IM,IMD,IC,ICQ              |      |      |      | 0.508 | G | 0.458 | 0.389 | 0.341 | 0.983 |  |  |
|                                 | ORF DQ515897                             | rs10505477 | AH,AN,A5,A6,I6Q,IMD,ICQ                    | 2117 | 4213 | 2054 | 0.496 | A | 0.442 | 0.378 | 0.341 | 0.900 |  |  |
| Lung cancer                     | CHRNA3                                   | rs8034191  | A6,I3,I5,I6,I6Q,IM,IMD,IC,ICQ              |      |      |      | 0.361 | G | 0.433 | 0.044 | 0.011 | 0.142 |  |  |
|                                 | CRP                                      | rs2808630  | I3,I5,I6,I6Q,IM,IMD,IC,ICQ                 |      |      |      | 0.305 | G | 0.283 | 0.244 | 0.114 | 0.183 |  |  |
|                                 | IL1RAP                                   | rs7626795  | AG,A6,I3,I5,I6,I6Q,IM,IMD,IC,ICQ           | 6209 | 1910 | 154  | 0.134 | G | 0.133 | 0.200 | 0.205 | 0.450 |  |  |
|                                 | CHRNA3, CHRNA5, CHRNA4                   | rs8034191  | A6,I3,I5,I6,I6Q,IM,IMD,IC,ICQ              |      |      |      | 0.361 | G | 0.433 | 0.044 | 0.011 | 0.142 |  |  |
| Melanoma                        | CDC91L1                                  | rs910873   | A6,IM,IMD                                  |      |      |      | 0.098 | T | 0.092 | 0.000 | 0.000 | 0.000 |  |  |
| Neuroblastoma                   | FLJ22536, FLJ44180                       | rs6939340  | I3,I5,I6,I6Q,IM,IMD,IC,ICQ                 |      |      |      | 0.469 | G | 0.425 | 0.644 | 0.682 | 0.883 |  |  |
| Prostate cancer                 | MSMB                                     | rs10993994 | I1,I3,I5,I6,I6Q,IM,IMD,IC,ICQ              |      |      |      | 0.391 | T | 0.339 | 0.411 | 0.477 | 0.800 |  |  |
|                                 | KLK3                                     | rs2735839  | I3,I5,I6,I6Q,IM,IMD,IC,ICQ                 |      |      |      | 0.129 | G | 0.092 | 0.356 | 0.400 | 0.400 |  |  |
|                                 | Intergenic                               | rs7931342  | I2,I5,I6,I6Q,IM,IMD                        |      |      |      | 0.455 | G | 0.508 | 0.227 | 0.302 | 0.883 |  |  |
|                                 | SLC22A3                                  | rs9364554  | I3,I5,I6,I6Q,IM,IMD,IC,ICQ                 |      |      |      | 0.271 | T | 0.233 | 0.364 | 0.318 | 0.008 |  |  |
|                                 | LMTK2                                    | rs6465657  | I3,I5,I6,I6Q,IM,IMD,IC,ICQ                 |      |      |      | 0.434 | C | 0.525 | 0.089 | 0.057 | 0.000 |  |  |
|                                 | NUDT10, NUDT11, LOC340602, GSPT2, MAGED1 | rs5945572  | I3,I5,I6,I6Q,IM,IMD,IC,ICQ                 |      |      |      | -     | A | 0.389 | 0.059 | 0.106 | 0.333 |  |  |
|                                 | EHBP1                                    | rs721048   | IM,IMD                                     |      |      |      | 0.177 | A | 0.117 | 0.022 | 0.045 | 0.000 |  |  |
|                                 | Intergenic                               | rs1529276  | AH                                         |      |      |      | 0.187 | - | 0.183 | 0.000 | 0.034 | 0.000 |  |  |
|                                 | CTDSPL                                   | rs9311171  | AH,A6,I6Q,IM,IMD,IC,ICQ                    |      |      |      | 0.159 | - | 0.175 | 0.089 | 0.011 | 0.567 |  |  |
|                                 | HAPLN1                                   | rs4466137  | AX,AN,A5,A6                                | 4757 | 3079 | 504  | 0.245 | - | 0.225 | 0.167 | 0.159 | 0.175 |  |  |
|                                 | PKHD1                                    | rs10498792 | AX,I3,I5,I6,I6Q,IM,IMD,IC,ICQ              |      |      |      | 0.111 | - | 0.108 | 0.211 | 0.111 | 0.267 |  |  |
|                                 | Intergenic                               | rs345013   | AX                                         |      |      |      | 0.128 | - | 0.117 | 0.156 | 0.205 | 0.058 |  |  |
|                                 | TCF2                                     | rs4430796  | I2,I5,I6,I6Q,IM,IMD,IBC                    |      |      |      | 0.487 | A | 0.467 | 0.722 | 0.667 | 0.390 |  |  |
|                                 | Intergenic                               | rs1859962  | I3,I5,I6,I6Q,IM,IMD,IC,ICQ                 |      |      |      | 0.531 | G | 0.492 | 0.511 | 0.800 | 0.792 |  |  |
|                                 | Intergenic                               | rs16901979 | AS,A5,A6                                   | 7947 | 429  | 6    | 0.026 | - | 0.025 | 0.289 | 0.156 | 0.542 |  |  |
|                                 | Intergenic                               | rs6983267  | A6,I3,I5,I6,I6Q,IM,IMD,IC,ICQ              |      |      |      | 0.508 | G | 0.458 | 0.389 | 0.341 | 0.983 |  |  |
| Prostate cancer (aggressive)    | MSMB                                     | rs10993994 | I1,I3,I5,I6,I6Q,IM,IMD,IC,ICQ              |      |      |      | 0.391 | T | 0.339 | 0.411 | 0.477 | 0.800 |  |  |
|                                 | Intergenic                               | rs10896449 | I2,I5,I6,I6Q,IM,IMD                        |      |      |      | 0.461 | G | 0.508 | 0.089 | 0.033 | 0.708 |  |  |
|                                 | CTBP2                                    | rs4962416  | I2,I5,I6,I6Q,IM,IMD                        |      |      |      | 0.271 | C | 0.229 | 0.011 | 0.011 | 0.233 |  |  |
|                                 | JAZF1                                    | rs10486567 | AH,I3,I5,I6,I6Q,IM,IMD,IC,ICQ              |      |      |      | 0.231 | G | 0.267 | 0.844 | 0.867 | 0.317 |  |  |

Supplement to Notifiable genetic variants on commercially-available SNP arrays

|                                       |                              |            |                                            |      |      |      |  |       |   |       |       |       |       |
|---------------------------------------|------------------------------|------------|--------------------------------------------|------|------|------|--|-------|---|-------|-------|-------|-------|
| Dermatologic Disorders                |                              |            |                                            |      |      |      |  |       |   |       |       |       |       |
| Psoriasis                             | COG6                         | rs7993214  | I3,I5,I6,I6Q,IM,IMD,IC,ICQ                 |      |      |      |  | 0.321 | - | 0.442 | 0.156 | 0.193 | 0.300 |
|                                       | SPATA2                       | rs495337   | I1                                         |      |      |      |  | 0.395 | - | 0.430 | 0.330 | 0.398 | 0.076 |
| Autoimmune Diseases                   |                              |            |                                            |      |      |      |  |       |   |       |       |       |       |
| Celiac disease                        | RGS1                         | rs2816316  | I3,I5,I6,I6Q,IM,IMD,IC,ICQ                 |      |      |      |  | 0.187 | C | 0.217 | 0.178 | 0.284 | 0.267 |
|                                       | IL12A,SCHIP1                 | rs17810546 | I3,I5,I6,I6Q,IM,IMD,IC,ICQ                 |      |      |      |  | 0.119 | G | 0.100 | 0.000 | 0.000 | 0.000 |
|                                       | IL1RL1,IL18R1,IL18RAP,SLC9A4 | rs13015714 | I3,I5,I6,I6Q,IM,IMD,IC,ICQ                 |      |      |      |  | 0.219 | C | 0.242 | 0.467 | 0.318 | 0.125 |
|                                       | LPP                          | rs1464510  | AH,I3,I5,I6,I6Q,IM,IMD,IC,ICQ              |      |      |      |  | 0.449 | A | 0.425 | 0.511 | 0.511 | 0.200 |
|                                       | TAGAP                        | rs1738074  | I1,I3,I5,I6,I6Q,IM,IMD,IC,ICQ              |      |      |      |  | 0.448 | A | 0.508 | 0.364 | 0.295 | 0.288 |
| Systemic lupus erythematosus          | ITGAM,ITGAX                  | rs11574637 | AN,A6,I2,I5,I6,I6Q,IM,IMD                  | 5303 | 2609 | 297  |  | 0.195 | C | 0.142 | 0.011 | 0.000 | 0.292 |
|                                       | C8orf13,BLK                  | rs13277113 | I2,I5,I6,I6Q,IM,IMD                        |      |      |      |  | 0.238 | A | 0.254 | 0.688 | 0.605 | 0.098 |
|                                       | BANK1                        | rs10516487 | AH,AN,A5,A6,I3,I5,I6,I6Q,IM,IMD,IC,ICQ     | 4134 | 3502 | 740  |  | 0.297 | G | 0.250 | 0.189 | 0.136 | 0.308 |
| Systemic lupus erythematosus in women | ITGAM                        | rs9888739  | I3,I5,I6,I6Q,IM,IMD,IC,ICQ                 |      |      |      |  | 0.136 | T | 0.108 | 0.011 | 0.000 | 0.708 |
|                                       | KIAA1542                     | rs4963128  | I3,I5,I6,I6Q,IM,IMD,IC,ICQ                 |      |      |      |  | 0.346 | - | 0.350 | 0.033 | 0.022 | 0.550 |
|                                       | PXK                          | rs6445975  | I3,I5,I6,I6Q,IM,IMD,IC,ICQ                 |      |      |      |  | 0.294 | C | 0.208 | 0.167 | 0.178 | 0.658 |
|                                       | Intergenic                   | rs10798269 | I3,I5,I6,I6Q,IM,IMD,IC,ICQ                 |      |      |      |  | 0.346 | - | 0.375 | 0.244 | 0.256 | 0.533 |
| Celiac disease                        | KIAA1109,TENR,IL2            | rs6822844  | I3,I5,I6,IM,IMD,IC,IBC                     |      |      |      |  | 0.186 | G | 0.203 | 0.000 | 0.000 | 0.000 |
| Crohn's disease                       | BSN,MST1                     | rs9858542  | AS,A5,A6,I1,IM,IMD,IBC                     | 4206 | 3454 | 718  |  | 0.292 | A | 0.242 | 0.044 | 0.078 | 0.200 |
|                                       | NKX2-3                       | rs10883365 | AN,A5,A6,IBC                               | 2095 | 4192 | 2087 |  | 0.500 | G | 0.500 | 0.456 | 0.500 | 0.508 |
|                                       | PTPN2                        | rs2542151  | AN,A5,A6,IM,IMD,IBC                        | 5855 | 2259 | 236  |  | 0.164 | G | 0.192 | 0.189 | 0.078 | 0.200 |
|                                       | IRGM                         | rs1000113  | AS,A5,A6,IM,IMD,IBC                        | 6837 | 1411 | 71   |  | 0.093 | T | 0.033 | 0.378 | 0.398 | 0.284 |
|                                       |                              | rs9469220  | AN,A5,A6,IM,IMD,IBC                        | 2425 | 4076 | 1882 |  | 0.468 | A | 0.400 | 0.651 | 0.633 | 0.612 |
|                                       | IRGM                         | rs13361189 | AN,A5,A6,IBC                               | 6822 | 1433 | 74   |  | 0.095 | - | 0.025 | 0.422 | 0.389 | 0.533 |
|                                       | NKX2-3                       | rs10883365 | AN,A5,A6,IBC                               | 2095 | 4192 | 2087 |  | 0.500 | G | 0.500 | 0.456 | 0.500 | 0.508 |
|                                       | PTPN2                        | rs2542151  | AN,A5,A6,IM,IMD,IBC                        | 5855 | 2259 | 236  |  | 0.164 | - | 0.192 | 0.189 | 0.078 | 0.200 |
|                                       | Intergenic                   | rs10801047 | AS,A5,A6,IBC                               | 7114 | 1203 | 63   |  | 0.079 | - | 0.092 | 0.100 | 0.133 | 0.417 |
|                                       | ATG16L1                      | rs2241880  | AG,I3,I5,I6,I6Q,IM,IMD,IC,ICQ              | 2341 | 4117 | 1918 |  | 0.475 | G | 0.542 | 0.389 | 0.170 | 0.275 |
|                                       | Intergenic                   | rs2241136  | AS,A5,A6,I1,I3,I5,I6,I6Q,IM,IMD,IC,ICQ,IBC | 5862 | 2285 | 206  |  | 0.161 | - | 0.133 | 0.211 | 0.307 | 0.842 |
|                                       | Intergenic                   | rs1373692  | I3,I5,I6,I6Q,IM,IMD,IC,ICQ,IBC             |      |      |      |  | 0.402 | - | 0.400 | 0.833 | 0.922 | 0.333 |
|                                       | Gastrointestinal Disorders   |            |                                            |      |      |      |  |       |   |       |       |       |       |
| Gallstones                            | ABCG8                        | rs11887534 | No arrays. in HapMap                       |      |      |      |  | 0.074 | C | 0.085 | 0.022 | 0.011 | 0.042 |
| Inflammatory bowel disease            | IL23R                        | rs7517847  | I3,I5,I6,I6Q,IM,IMD,IC,ICQ,IBC             |      |      |      |  | 0.423 | C | 0.500 | 0.422 | 0.364 | 0.117 |
|                                       | IL23R                        | rs11209026 | AN,A5,A6,I3,I5,I6,I6Q,IM,IMD,IC,ICQ,IBC    | 7156 | 1145 | 40   |  | 0.073 | A | 0.067 | 0.000 | 0.000 | 0.017 |
| Metabolic Disorders                   |                              |            |                                            |      |      |      |  |       |   |       |       |       |       |
| Type 1 diabetes                       | RAB5B,SUOX,IKZF4,ERBB3,CDK2  | rs1701704  | I3,I5,I6,I6Q,IM,IMD,IC,ICQ                 |      |      |      |  | 0.317 | C | 0.292 | 0.278 | 0.261 | 0.095 |
|                                       | KIAA0350                     | rs2903692  | I2,I5,I6,I6Q,IM,IMD                        |      |      |      |  | 0.368 | G | 0.284 | 0.267 | 0.159 | 0.267 |
|                                       | SH2B3,LNK,TRAFD1,PTPN1       | rs17696736 | AN,A5,A6,I2,I5,I6,I6Q,IM,IMD,IBC           | 2490 | 4079 | 1795 |  | 0.458 | G | 0.350 | 0.000 | 0.000 | 0.000 |
|                                       | ERBB3                        | rs11171739 | AS,A5,A6,IM,IMD,IBC                        | 2874 | 4110 | 1387 |  | 0.411 | C | 0.375 | 0.278 | 0.267 | 0.842 |
|                                       | KIAA0350                     | rs12708716 | AS,A6,IBC                                  | 3293 | 3275 | 1253 |  | 0.370 | A | 0.288 | 0.233 | 0.156 | 0.466 |
|                                       |                              | rs11052552 | AS,A5,A6,I3,I5,I6,I6Q,IM,IMD,IC,ICQ,IBC    | 2124 | 4185 | 2054 |  | 0.496 | G | 0.483 | 0.330 | 0.398 | 0.858 |
|                                       |                              | rs17388568 | AS,A5,A6,IM,IMD,IBC                        | 4807 | 3067 | 509  |  | 0.244 | A | 0.300 | 0.111 | 0.089 | 0.008 |
|                                       | ERBB3                        | rs2292239  | AS,A5,A6,IM,IMD,IBC                        | 3839 | 3659 | 882  |  | 0.324 | A | 0.300 | 0.256 | 0.256 | 0.417 |
|                                       | KIAA0350                     | rs12708716 | AS,A6,IBC                                  | 3293 | 3275 | 1253 |  | 0.370 | A | 0.288 | 0.233 | 0.156 | 0.466 |
|                                       | PTPN2                        | rs2542151  | AN,A5,A6,IM,IMD,IBC                        | 5855 | 2259 | 236  |  | 0.164 | - | 0.192 | 0.189 | 0.078 | 0.200 |
|                                       | CD226                        | rs763361   | AG,I1,I3,I5,I6,I6Q,IM,IMD,IC,ICQ,IBC       | 2241 | 4140 | 1992 |  | 0.485 | A | 0.475 | 0.322 | 0.477 | 0.725 |
|                                       |                              | rs864745   | AN,A5,A6,IBC                               | 2111 | 4157 | 2112 |  | 0.500 | T | 0.482 | 0.189 | 0.216 | 0.237 |
|                                       |                              | rs12779790 | IBC                                        |      |      |      |  | 0.178 | G | 0.229 | 0.133 | 0.122 | 0.051 |
|                                       |                              | rs7961581  | AS,A5,A6,IBC                               | 4155 | 3468 | 760  |  | 0.298 | C | 0.233 | 0.200 | 0.198 | 0.178 |
|                                       |                              | rs7578597  | AG,I3,I5,I6,I6Q,IM,IMD,IC,ICQ,IBC          | 6628 | 1487 | 80   |  | 0.100 | T | 0.083 | 0.000 | 0.000 | 0.292 |
| Type 2 diabetes                       | ADAMTS9                      | rs4607103  | AS,A5,A6,IBC                               | 4525 | 3224 | 580  |  | 0.263 | C | 0.192 | 0.422 | 0.411 | 0.275 |
|                                       | FTO                          | rs9939609  | AS,A5,A6,IBC                               | 2935 | 4083 | 1346 |  | 0.405 | A | 0.450 | 0.122 | 0.167 | 0.517 |

Supplement to Notifiable genetic variants on commercially-available SNP arrays

|                                                      |                |            |                                         |                            |      |      |       |       |       |       |       |       |
|------------------------------------------------------|----------------|------------|-----------------------------------------|----------------------------|------|------|-------|-------|-------|-------|-------|-------|
|                                                      | CDKAL1         | rs9465871  | AS,A5,A6,IBC                            | 5308                       | 2705 | 371  | 0.206 | C     | 0.150 | 0.478 | 0.456 | 0.617 |
|                                                      |                | rs358806   | AN,A5,A6,I2,I5,I6,I6Q,IM,IMD,IBC        | 5312                       | 2606 | 316  | 0.197 | -     | 0.212 | 0.227 | 0.291 | 0.105 |
|                                                      |                | rs12304921 | AS,A6,IBC                               | 5933                       | 2213 | 204  | 0.157 | G     | 0.175 | 0.534 | 0.375 | 0.133 |
|                                                      |                | rs1495377  | AS,A5,A6,IBC                            | 2134                       | 4205 | 1966 | 0.490 | G     | 0.467 | 0.256 | 0.307 | 0.155 |
|                                                      | IGF2BP2        | rs4402960  | AS,A5,A6,I2,I5,I6,I6Q,IM,IMD,IBC        | 3847                       | 3341 | 954  | 0.322 | T     | 0.292 | 0.222 | 0.311 | 0.550 |
|                                                      | CDKN2A,CDKN2B  | rs10811661 | AS,A5,A6,IBC                            | 5657                       | 2392 | 273  | 0.177 | T     | 0.208 | 0.405 | 0.433 | 0.000 |
|                                                      | CDKAL1         | rs7754840  | AS,A5,A6,I6Q,IMD,IBC                    | 3872                       | 3636 | 874  | 0.321 | C     | 0.308 | 0.411 | 0.378 | 0.667 |
|                                                      | IGF2BP2        | rs4402960  | AS,A5,A6,I2,I5,I6,I6Q,IM,IMD,IBC        | 3847                       | 3341 | 954  | 0.322 | T     | 0.292 | 0.222 | 0.311 | 0.550 |
|                                                      | CDKN2A, CDKN2B | rs10811661 | AS,A5,A6,IBC                            | 5657                       | 2392 | 273  | 0.177 | T     | 0.208 | 0.405 | 0.433 | 0.000 |
|                                                      | CDKAL1         | rs7754840  | AS,A5,A6,I6Q,IMD,IBC                    | 3872                       | 3636 | 874  | 0.321 | C     | 0.308 | 0.411 | 0.378 | 0.667 |
|                                                      | Intergenic     | rs9300039  | AX,I3,I5,I6,I6Q,IM,IMD,IC,ICQ           |                            |      |      | 0.094 | C     | 0.108 | 0.300 | 0.278 | 0.169 |
|                                                      | CDKAL1         | rs7756992  | AG,A6,I3,I5,I6,I6Q,IM,IMD,IC,ICQ        | 4340                       | 3351 | 686  | 0.282 | G     | 0.250 | 0.467 | 0.466 | 0.633 |
|                                                      | CDKN2B         | rs10811661 | AS,A5,A6,IBC                            | 5657                       | 2392 | 273  | 0.177 | T     | 0.208 | 0.405 | 0.433 | 0.000 |
|                                                      | FTO            | rs8050136  | AS,A5,A6,I3,I5,I6,I6Q,IM,IMD,IC,ICQ     | 2928                       | 4042 | 1351 | 0.405 | A     | 0.450 | 0.122 | 0.167 | 0.467 |
|                                                      | CDKAL1         | rs10946398 | AS,A5,A6,IBC                            | 3857                       | 3635 | 875  | 0.322 | C     | 0.308 | 0.411 | 0.378 | 0.667 |
|                                                      | HHEX           | rs5015480  | AS,A5,A6,I2,I5,I6,I6Q,IM,IMD,IBC        | 3051                       | 3997 | 1313 | 0.396 | C     | 0.552 | 0.211 | 0.189 | 0.568 |
|                                                      | SLC30A8        | rs13266634 | I3,I5,I6,I6Q,IM,IMD,IC,ICQ,IBC          |                            |      |      | 0.258 | C     | 0.250 | 0.478 | 0.444 | 0.058 |
|                                                      | HHEX           | rs1111875  | A6,I1,I3,I5,I6,I6Q,IM,IMD,IC,ICQ,IBC    |                            |      |      | 0.395 | G     | 0.442 | 0.678 | 0.591 | 0.142 |
| Incident diabetes                                    | TMEFF2         | rs10497721 | AX                                      |                            |      |      | 0.094 | -     | 0.042 | 0.367 | 0.250 | 0.025 |
| Diabetic nephropathy                                 | ELMO1          | rs741301   | A6,I3,I5,I6,I6Q,IM,IMD,IC,ICQ           |                            |      |      | 0.333 | -     | 0.333 | 0.267 | 0.409 | 0.675 |
| End-stage renal disease                              | PVT1           | rs2648875  | I6,IM,IMD                               |                            |      |      | 0.236 | A     | 0.317 | 0.600 | 0.705 | 0.475 |
| Neurodegenerative Disorders                          |                |            |                                         |                            |      |      |       |       |       |       |       |       |
| Amyotrophic lateral sclerosis                        | DPP6           | rs10260404 | I3,I5,I6,I6Q,IM,IMD,IC,ICQ              |                            |      |      | 0.381 | C     | 0.392 | 0.200 | 0.140 | 0.350 |
|                                                      | ITPR2          | rs2306677  | AG,I3,I5,I6,I6Q,IM,IMD,IC,ICQ           | 6752                       | 1532 | 90   | 0.102 | -     | 0.083 | 0.200 | 0.205 | 0.254 |
|                                                      | Intergenic     | rs4363506  | A6,I3,I5,I6,I6Q,IM,IMD,IC,ICQ           |                            |      |      | 0.425 | -     | 0.325 | 0.544 | 0.489 | 0.283 |
|                                                      |                | rs16984239 | AS,A5,A6,I3,I5,I6,I6Q,IM,IMD,IC,ICQ     | 5599                       | 2486 | 299  | 0.184 | -     | 0.183 | 0.322 | 0.211 | 0.025 |
|                                                      |                | rs12680546 | I3,I5,I6,I6Q,IM,IMD,IC,ICQ              |                            |      |      | 0.273 | -     | 0.325 | 0.122 | 0.070 | 0.043 |
|                                                      |                | ZFP64      | rs6013382                               | I3,I5,I6,I6Q,IM,IMD,IC,ICQ |      |      |       | 0.466 | -     | 0.466 | 0.267 | 0.367 |
| Parkinson's disease                                  | SUSD1          | rs2782931  | I3,I5,I6,I6Q,IM,IMD,IC,ICQ              |                            |      |      | 0.323 | -     | 0.325 | 0.311 | 0.205 | 0.133 |
|                                                      | Intergenic     | rs1480597  | AH,I3,I5,I6,I6Q,IM,IMD,IC,ICQ           |                            |      |      | 0.180 | -     | 0.133 | 0.011 | 0.000 | 0.033 |
|                                                      | BRDG1          | rs2242330  | I1,IM,IMD                               |                            |      |      | 0.225 | -     | 0.190 | 0.233 | 0.136 | 0.093 |
|                                                      | DLG2           | rs10501570 | AX,I3,I5,I6,I6Q,IM,IMD,IC,ICQ           |                            |      |      | 0.181 | -     | 0.217 | 0.022 | 0.011 | 0.000 |
| Multiple sclerosis                                   | SEMA5A         | rs7702187  | No arrays, not in HapMap                |                            |      |      | 0.151 | -     | 0.175 | 0.322 | 0.295 | 0.670 |
|                                                      | IL2RA          | rs12722489 | AN,A6,IMD                               | 6159                       | 2058 | 163  | 0.142 | C     | 0.158 | 0.144 | 0.167 | 0.000 |
|                                                      | IL7RA          | rs6897932  | AS,A5,A6,I3,I5,I6,I6Q,IM,IMD,IC,ICQ,IBC | 4656                       | 3153 | 560  | 0.255 | C     | 0.242 | 0.200 | 0.193 | 0.050 |
|                                                      | KIAA0350       | rs6498169  | AN,A5,A6                                | 3728                       | 3689 | 955  | 0.334 | G     | 0.392 | 0.578 | 0.533 | 0.200 |
|                                                      | RPL5           | rs6604026  | AN,A5,A6,I3,I5,I6,I6Q,IM,IMD,IC,ICQ     | 4301                       | 3367 | 715  | 0.286 | C     | 0.258 | 0.011 | 0.011 | 0.250 |
| APOE*e4 carriers with late onset Alzheimer's disease | DBC1           | rs10984447 | AN,A5,A6                                | 4958                       | 2981 | 319  | 0.219 | A     | 0.373 | 0.111 | 0.178 | 0.034 |
|                                                      | GAB2           | rs2373115  | AN,A5,A6,I1,IBC                         | 5727                       | 2396 | 249  | 0.173 | G     | 0.108 | 0.422 | 0.533 | 0.350 |
| Exfoliation glaucoma                                 | LOXL1          | rs3825942  | I1,IM,IMD                               |                            |      |      | 0.161 | G     | 0.172 | 0.111 | 0.125 | 0.415 |
| Wet age-related macular degeneration                 | HTRA1          | rs11200638 | No arrays, not in HapMap                |                            |      |      | -     | A     | -     | -     | -     | -     |
| Age-related macular degeneration                     | CFH            | rs380390   | AX                                      |                            |      |      | 0.400 | C     | 0.450 | 0.078 | 0.068 | 0.233 |

Supplement to Notifiable genetic variants on commercially-available SNP arrays

| Psychiatric Disorders |                     |            |                                         |                            |      |      |       |       |       |       |       |       |       |
|-----------------------|---------------------|------------|-----------------------------------------|----------------------------|------|------|-------|-------|-------|-------|-------|-------|-------|
| Bipolar disorder      | PALB2,NDUFAB1,DCTN5 | rs420259   | AS,A5,A6,I3,I5,I6,I6Q,IM,IMD,IC,ICQ,IBC | 4212                       | 3401 | 654  | 0.285 | A     | 0.200 | 0.378 | 0.333 | 0.425 |       |
|                       |                     | rs6458307  | AN,A5,A6,I3,I5,I6,IM,IMD,IC,IBC         | 4004                       | 3613 | 642  | 0.296 | -     | 0.336 | 0.222 | 0.273 | 0.567 |       |
|                       |                     | rs683395   | AN,A5,A6,I3,I5,I6,I6Q,IM,IMD,IC,ICQ,IBC | 6846                       | 1463 | 72   | 0.096 | G     | 0.100 | 0.067 | 0.100 | 0.208 |       |
|                       |                     | rs3761218  | AS,A5,A6,IM,IMD,IBC                     | 3029                       | 3964 | 1376 | 0.401 | C     | 0.408 | 0.289 | 0.267 | 0.212 |       |
|                       |                     | rs2953145  | AS,A5,A6,IBC                            | 5136                       | 2775 | 395  | 0.215 | C     | 0.208 | 0.067 | 0.011 | 0.200 |       |
|                       |                     | DGKH       | rs1012053                               | I3,I5,I6,I6Q,IM,IMD,IC,ICQ |      |      |       | 0.162 | A     | 0.150 | 0.533 | 0.522 | 0.075 |
| Neuroticism           | PDE3D               | rs702543   | AH,I3,I5,I6,I6Q,IM,IMD,IC,ICQ           |                            |      |      | 0.565 | A     | 0.492 | 0.690 | 0.727 | 0.042 |       |
| Schizophrenia         | CCDC60              | rs11064768 | AG,A6,I2,I5,I6,I6Q,IM,IMD               | 6992                       | 1287 | 65   | 0.085 | A     | 0.095 | 0.000 | 0.000 | 0.000 |       |
|                       | CDF2RA              | rs4129148  | AS,A5,A6                                | 3670                       | 3685 | 988  | 0.339 | C     | 0.342 | 0.515 | 0.379 | 0.669 |       |
